# Supplementary material for: Assessment of sealing efficacy, radiopacity, and surface topography of a bioinspired polymer for perforation repair
Source: PeerJ. 2024 Apr 29;12:e17237. doi: 10.7717/peerj.17237 (PMC11064857; doi:10.7717/peerj.17237)
Supplement: Supplemental Information 1 [file peerj-12-17237-s001.xlsx]

## Sheet: Sheet1
43µm
48
53
39
36
38
40
42
45
47
49
51
52
54
46
37
