# Supplementary material for: Assessment of sealing efficacy, radiopacity, and surface topography of a bioinspired polymer for perforation repair
Source: PeerJ. 2024 Apr 29;12:e17237. doi: 10.7717/peerj.17237 (PMC11064857; doi:10.7717/peerj.17237)
Supplement: Supplemental Information 2 [file peerj-12-17237-s002.xlsx]

## Sheet: Sheet1
591µm
337
354
878
453
412
532
498
654
261
334
368
284
312
326
487
